# Supplementary material for: Genomic Scars Generated by Polymerase Theta Reveal the Versatile Mechanism of Alternative End-Joining
Source: PubMed Central journal article supplement (PMC5068794; doi:10.1371/journal.pgen.1006368), 2016-10-18

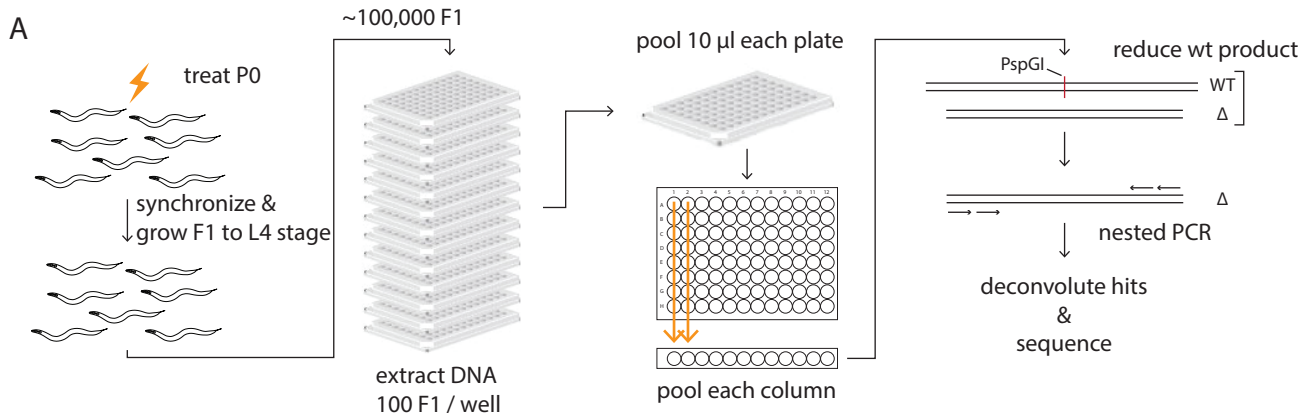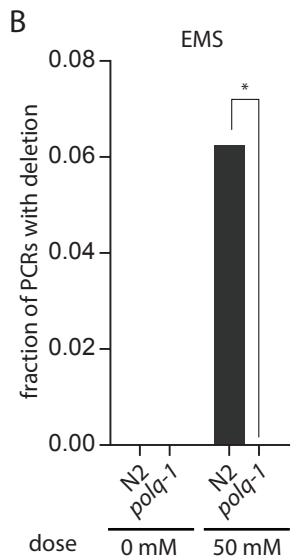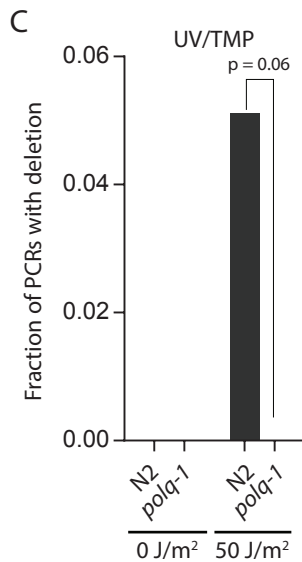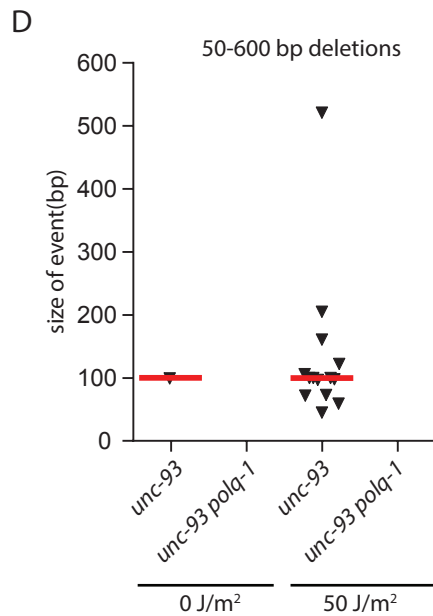

Supplement: pgen.1006368.s002.pdf [file pgen.1006368.s002.pdf]
